# Supplementary material for: Enhanced photoluminescence of potassium-doped tungsten oxide by acetone exposure
Source: Royal Society of Chemistry journal article supplement (doi:10.1039/d2ra06267d), 2023-01-01
Supplement: d2ra06267d1.pdf [file d2ra06267d1.pdf]

Enhanced Photoluminescence of Potassium-doped Tungsten Oxide by Acetone Exposure

Aman Patel<sup>1,\*</sup>, Lu Weigang<sup>1</sup>, Blake Birmingham<sup>1</sup>, Michael Johnson<sup>2</sup>, Danling Wang<sup>2</sup>, Zhenrong Zhang<sup>1</sup>, and Kai Wang<sup>3,4,\*</sup>

<sup>1</sup>*Department of Physics, Baylor University, Waco, Texas, 76798, USA*

<sup>2</sup>*Department of Electrical and Computer Engineering, North Dakota State University, Fargo, ND 58102, USA*

<sup>3</sup>*School of Physics and Astronomy, Sun Yat-sen University, Zhuhai 519082, China*

<sup>4</sup>*Center of Quantum Information Technology, Shenzhen Research Institute of Sun Yat-sen University, Nanshan Shenzhen 518087, China*

Corresponding authors\*

aman\_patel1@baylor.edu;

wangk289@mail.sysu.edu.cn;

S1. The Raman spectra acquired in ambient air.

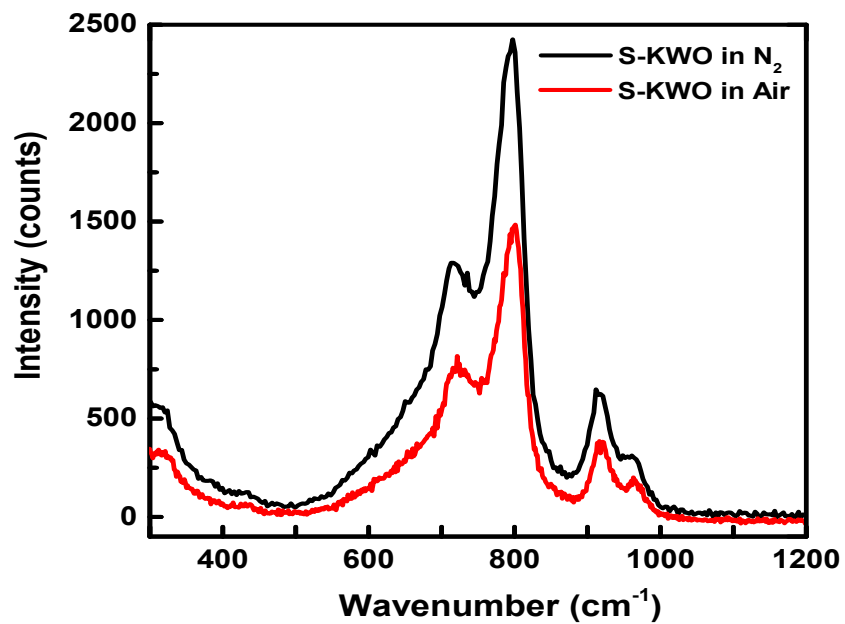

**Figure S1.** Raman spectra for S-KWO nanorods in air and in nitrogen with the 532 nm laser excitation inside the high pressure cell.

S2. Deconvolution of Raman spectra of NS-KWO and S-KWO from 500  $\text{cm}^{-1}$  to 875  $\text{cm}^{-1}$  range.

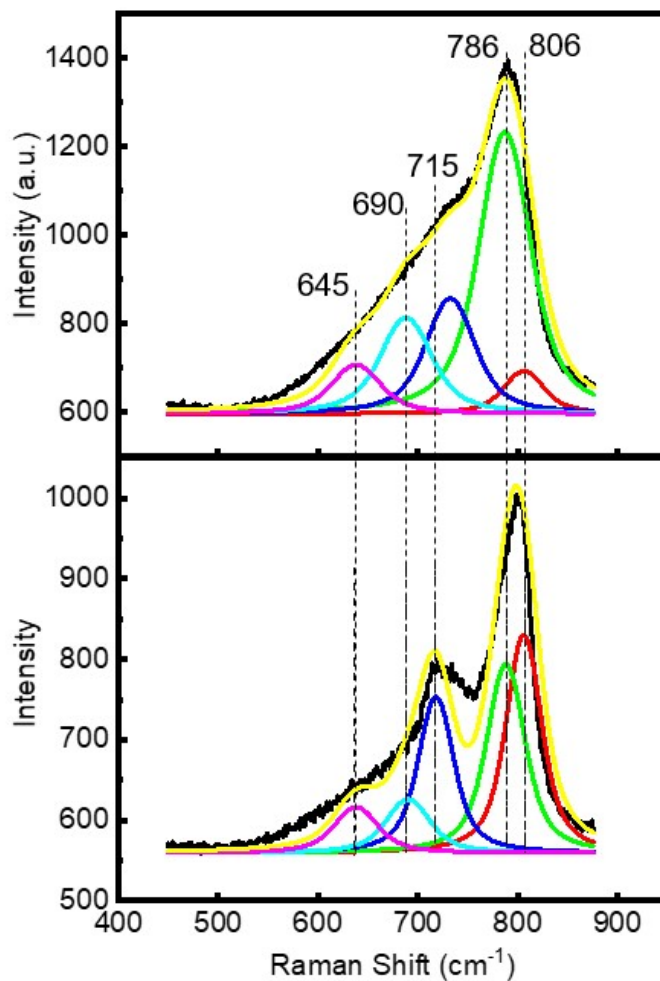

**Figure S2.** Deconvolution of Raman spectra of  $\text{K}_x\text{WO}$  nanorod samples with the 532 nm laser excitation. Spectra are obtained (a) on NS-KWO and (b) S-KWO in nitrogen. The spectra were fitted using Lorentzian plus Gaussian.

### S3. UV-Vis spectra of S-K<sub>1.8</sub>WO.

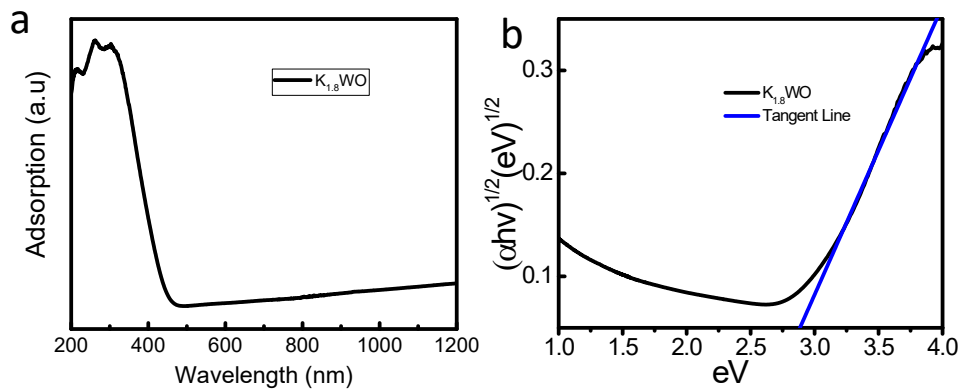

**Figure S3.** (a) UV-Vis spectra of S-K<sub>1.8</sub>WO and (b) the corresponding Tauc plot.

The bandgap was calculated via UV-Vis spectroscopy using Tauc plot:  $\alpha h\nu = A(h\nu - E_g)^{n/2}$ , where  $\alpha$ ,  $\nu$ ,  $h$ ,  $E_g$ , and  $A$  are absorption coefficient, light frequency, bandgap energy, Plank constant, and a constant, respectively.<sup>1</sup> For WO<sub>3</sub>, the value of  $n$  is 4 for the indirect transition.<sup>2</sup>  $E_g$  of WO<sub>3</sub> was calculated to be 2.9 eV.

S4. Fig. S4 shows a blank experiment in the absence of the KWO material conducted on glass substrate in acetone vapor in Linkam cell excited using a 532 nm laser. There is no fluorescence observed.

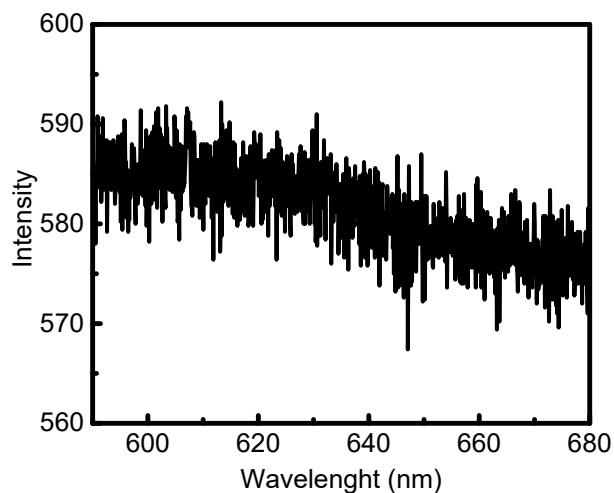

**Figure. S4.** Spectrum from the background experiment. The signal was collected from glass slide surface in acetone irritated by a 532 nm laser. There is no fluorescence signal observed.

S5. PL spectra of NS-KWO and S-KWO with and without N2/acetone are shown in Figure S5.

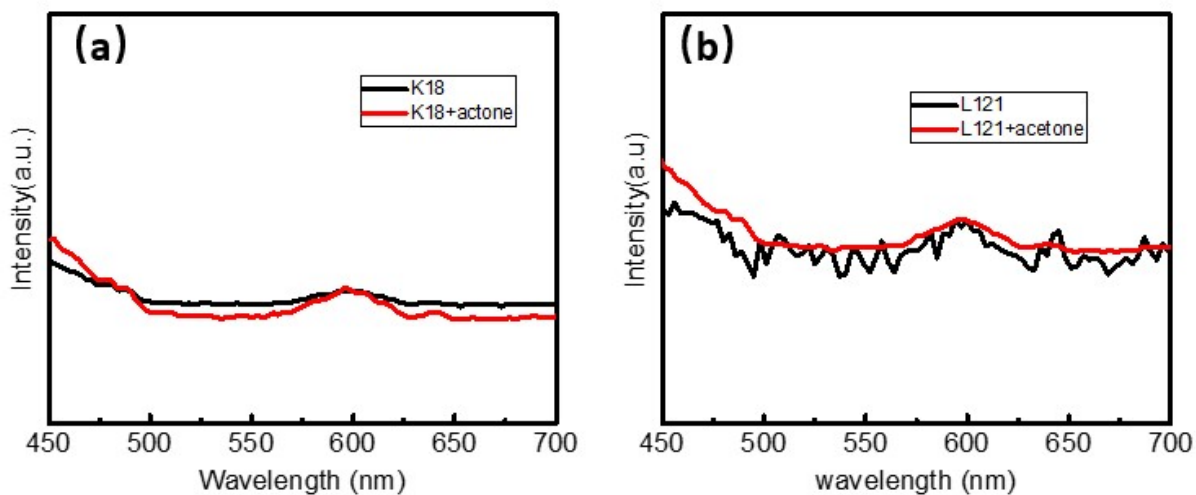

**Figure. S5.** Photoluminescence spectra of NS-KWO and S-KWO excited by a 405 nm laser with (Black) and without acetone (red), respectively.

**Reference:**

- (1) Li, N.; Teng, H.; Zhang, L.; Zhou, J.; Liu, M. Synthesis of Mo-Doped WO<sub>3</sub> Nanosheets with Enhanced Visible-Light-Driven Photocatalytic Properties. *RSC Adv.* **2015**, *5*, 95394-95400.
- (2) He, Y.; Wu, Z.; Fu, L.; Li, C.; Miao, Y.; Cao, L.; Fan, H.; Zou, B. Photochromism and Size Effect of WO<sub>3</sub> and WO<sub>3</sub>-TiO<sub>2</sub> Aqueous Sol. *Chem. Mater.* **2003**, *15*, 4039-4045.
